# Supplementary material for: Suppressive Effects of Flavonoids on Macrophage-Associated Adipocyte Inflammation in a Differentiated Murine Preadipocyte 3T3-L1 Cells Co-Cultured with a Murine Macrophage RAW264.7 Cells
Source: MDPI journal article supplement (doi:10.3390/plants11243552), 2022-12-16
Supplement: s1 [file s1]

Suppressive effects of flavonoids on macrophage-associated adipocyte inflammation in a differentiated murine preadipocyte 3T3-L1 cells co-cultured with a murine macrophage RAW264.7 cells

Dahae Lee <sup>1</sup>, Sukyong Hong <sup>2</sup>, Kiwon Jung <sup>2,3</sup>, Sung youl Choi <sup>4,\*</sup>, Ki Sung Kang <sup>1,\*</sup>

<sup>1</sup>Department of Preventive Medicine, College of Korean Medicine, Gachon University, Seongnam 13120, Korea; pjsldh@gachon.ac.kr (D. L.); kkang@gachon.ac.kr (K. S. K.)

<sup>2</sup>College of Pharmacy, CHA University, Sunghnam 13844, Republic of Korea; hongsk@chauniv.ac.kr (S. H.)

<sup>3</sup>Oncobix Co., Ltd., Yongin-si 16950, Gyeonggi-do, Republic of Korea; pharmj@oncobix.com (K. J.)

<sup>4</sup>Department of Neuropsychiatry, College of Korean Medicine, Gachon University

\*Correspondence: pc1075@gachon.ac.kr (S. C.), Tel.: +82-32-770-1343 (S. C.); kkang@gachon.ac.kr (K. S. K.), Tel.: +82-31-750-5402

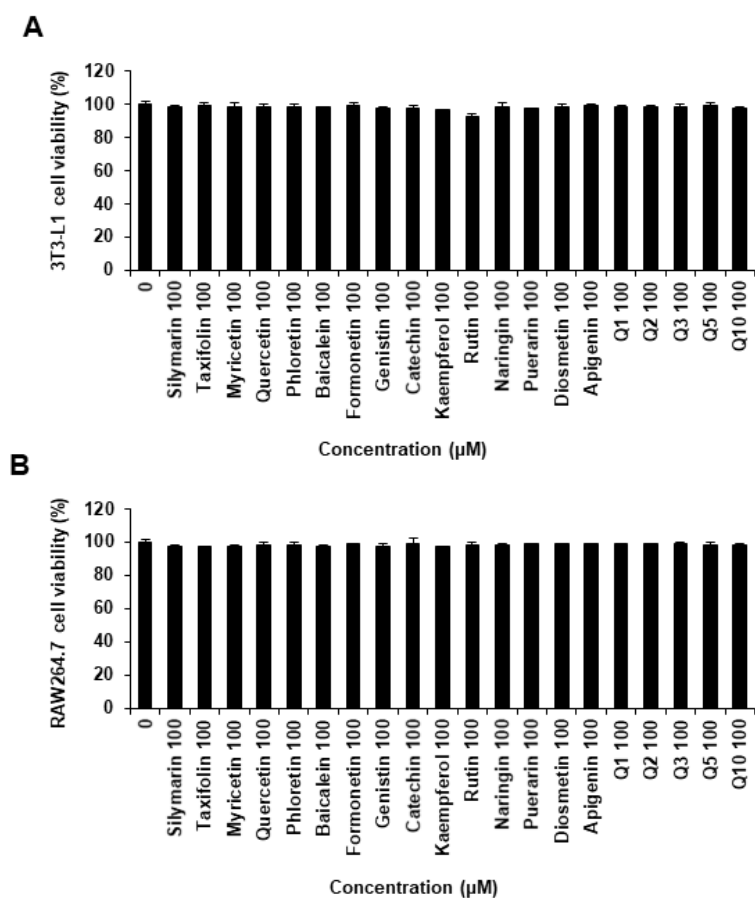

**Figure S1.** Effect of the flavonoids on the viability of 3T3-L1 preadipocytes and RAW264.7 cells. (A and B) Effect of flavonoids compared with the control (0  $\mu\text{M}$ ) on the viability of 3T3-L1 preadipocytes for 24 h. Cell viability was determined by the MTT assay. In individual experiments, each treatment condition was set up in quadruplicate, and each experiment was repeated 3 times independently ( $p < 0.05$  compared to untreated cells, Kruskal–Wallis non-parametric test). Data are represented as the mean  $\pm$  SEM.
